# Supplementary material
Source: PubMed Central journal article supplement (PMC5997465)
Supplement: sc8b00200_si_001.pdf [file sc8b00200_si_001.pdf]

## Supporting Information

### Effect of n-Caproate Concentration on Chain Elongation and Competing Processes

*Mark Roghair<sup>a</sup>, Yuchen Liu<sup>a</sup>, Julius C. Adiatma<sup>a</sup>, Ruud A. Weusthuis<sup>b</sup>, Marieke E. Bruins<sup>c</sup>, Cees J.N. Buisman<sup>a</sup>, David P.B.T.B. Strik<sup>a,\*</sup>*

<sup>a</sup> Sub-department of Environmental Technology, Wageningen University & Research, Bornse Weilanden 9, 6708 WG, Wageningen, the Netherlands

<sup>b</sup> Bioprocess Engineering, Wageningen University & Research, Droevendaalsesteeg 1, 6708 PB, Wageningen, the Netherlands

<sup>c</sup> Wageningen Food & Biobased Research, Wageningen University & Research, Bornse Weilanden 9, 6708 WG, Wageningen, the Netherlands

\* Corresponding author: E-mail: david.strik@wur.nl; tel +31 317 483 447

## Profiles of product production

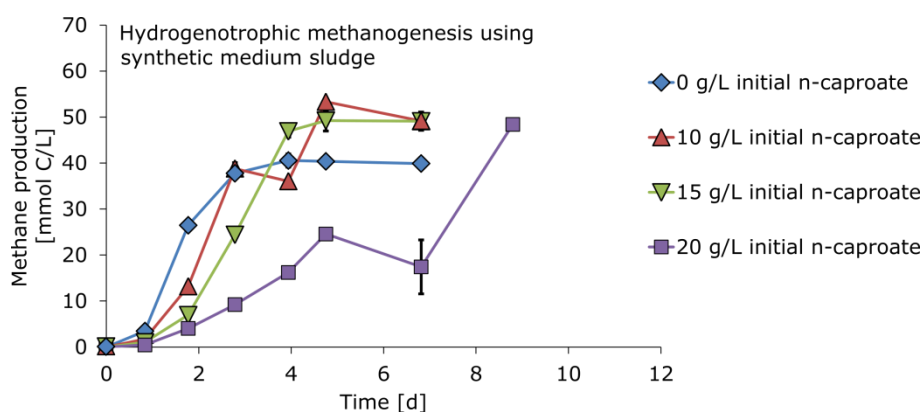

**Figure S1.** Methane production by hydrogenotrophic methanogenesis at different initial n-caproate concentrations using synthetic medium sludge. Values indicate averages of duplicates and bars indicate range of duplicates (often too small to be visual). T = 30 °C, pH = 6.8 (buffered).

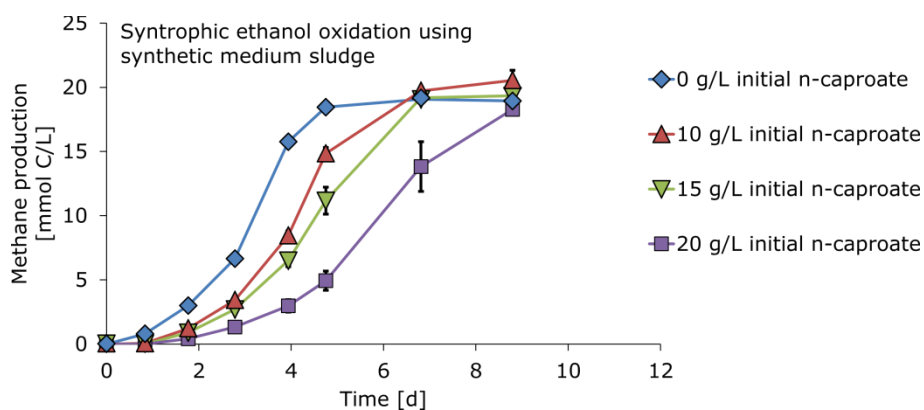

**Figure S2.** Methane production by syntrophic ethanol oxidation at different initial n-caproate concentrations using synthetic medium sludge. Values indicate averages of duplicates and bars indicate range of duplicates (often too small to be visual). T = 30 °C, pH = 6.8 (buffered).

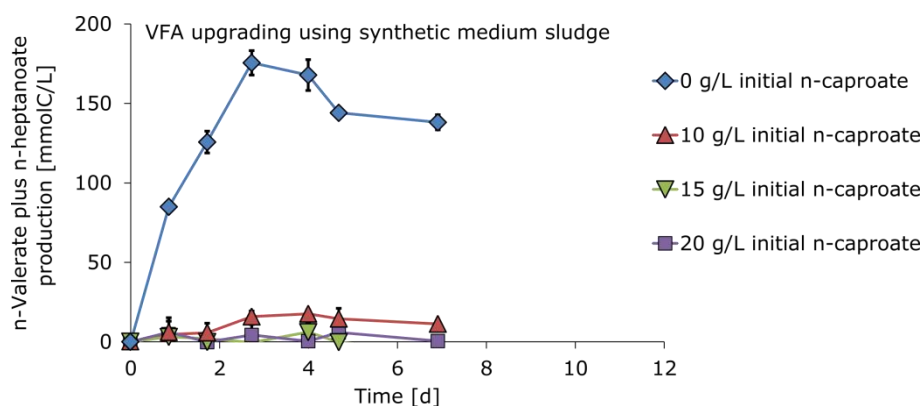

**Figure S3.** n-Valerate plus n-heptanoate production by VFA upgrading at different initial n-caproate concentrations using synthetic medium sludge. Values indicate averages of duplicates and bars indicate range of duplicates (often too small to be visual). T = 30 °C, pH = 6.8 (buffered).

## Profiles of product production

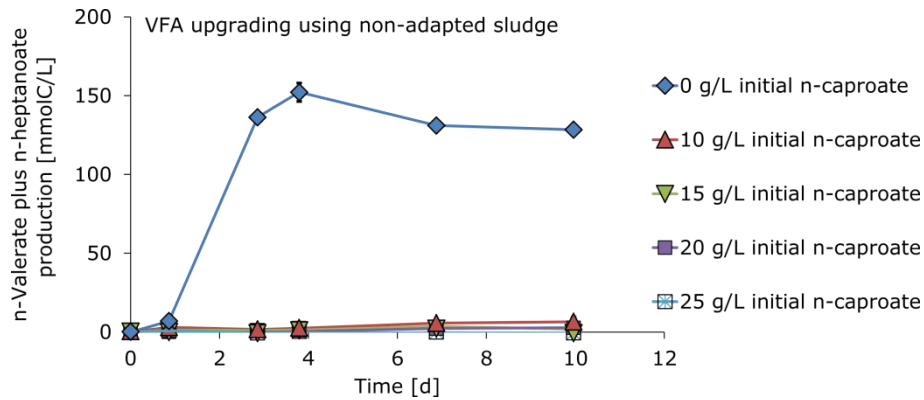

**Figure S4.** n-Valerate plus n-heptanoate production by VFA upgrading at different initial n-caproate concentrations using non-adapted sludge. Values indicate averages of duplicates and bars indicate range of duplicates (often too small to be visual). T = 30 °C, pH = 6.8 (buffered).

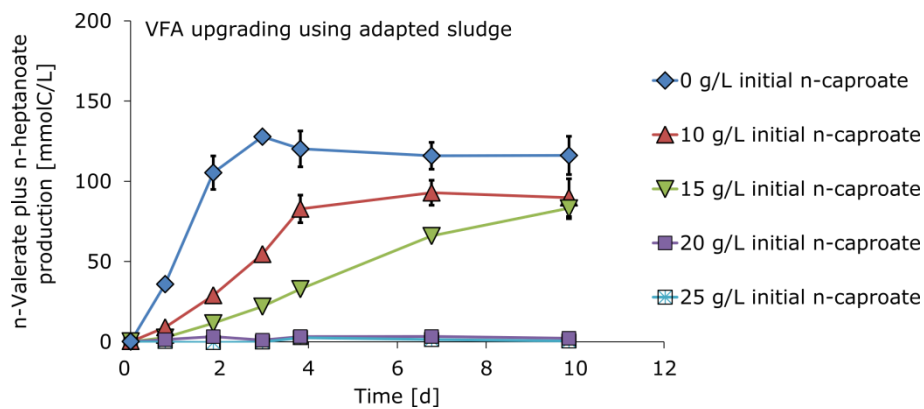

**Figure S5.** n-Valerate plus n-heptanoate production by VFA upgrading at different initial n-caproate concentrations using adapted sludge. Values indicate averages of duplicates and bars indicate range of duplicates (often too small to be visual). T = 30 °C, pH = 6.8 (buffered).

## Specifications ‘synthetic medium sludge’

Synthetic medium sludge was directly derived from a running continuous chain elongation process that converted synthetic substrates (propionate and ethanol) into MCFAs. The reactor configuration has been described previously<sup>1</sup>. Specifications on process conditions are reported in Table S1. Concentrations and rates of substrates and products are reported in Table S2.

**Table S1.** Specifications of process conditions that conditioned synthetic medium sludge

| Specification                | Unit  | Value                               |
|------------------------------|-------|-------------------------------------|
| Temperature                  | °C    | 30                                  |
| pH                           | -     | 6.8                                 |
| HRT                          | d     | 0.7                                 |
| Substrates in influent       | g/L   | 12.8 [Ethanol]<br>13.4 [Propionate] |
| CO <sub>2</sub> loading rate | L/L/d | 2.5                                 |
| Days after startup           | d     | 377                                 |
| VSS                          | g/L   | 0.61                                |

**Table S2.** Concentrations and rates of substrates and products in the process from which synthetic medium sludge was derived

| Compound        | Concentration<br>[mmol·L <sup>-1</sup> ] | Rate<br>[mmol·L <sup>-1</sup> ·d <sup>-1</sup> ] |
|-----------------|------------------------------------------|--------------------------------------------------|
| Ethanol         | 6.8 ± 2.9                                | -400.7 ± 36.7                                    |
| Propanol        | 3.5 ± 2.6                                | 5.1 ± 3.5                                        |
| Acetate         | 26.0 ± 4.8                               | 38.3 ± 6.7                                       |
| Propionate      | 59.1 ± 6.6                               | -179.9 ± 20.1                                    |
| Isobutyrate     | 0.2 ± 0.2                                | 0.3 ± 0.3                                        |
| n-Butyrate      | 15.3 ± 1.4                               | 22.6 ± 1.9                                       |
| Isovalerate     | 0.7 ± 0.1                                | 1.0 ± 0.1                                        |
| n-Valerate      | 88.6 ± 3.1                               | 131.0 ± 11.3                                     |
| Isocaproate     | 0.1 ± 0.1                                | 0.1 ± 0.2                                        |
| n-Caproate      | 29.3 ± 2.6                               | 43.3 ± 5.4                                       |
| n-Heptanoate    | 16.8 ± 2.6                               | 24.9 ± 4.5                                       |
| n-Caprylate     | 0.6 ± 0.1                                | 0.8 ± 0.2                                        |
| CO <sub>2</sub> | 23.2 ± 12.4 % <sup>i</sup>               | -91.3 ± 4.5                                      |
| CH <sub>4</sub> | 69.0 ± 26.1 % <sup>i</sup>               | 35.7 ± 6.4                                       |
| H <sub>2</sub>  | 2.2 ± 3.7 % <sup>i</sup>                 | 1.1 ± 1.7                                        |

<sup>i</sup> Concentrations of gaseous compounds (CO<sub>2</sub>, CH<sub>4</sub>, H<sub>2</sub>) are shown as percentage in the headspace at 1 atm

## Specifications 'synthetic medium sludge'

### Specific activity of syntrophic ethanol oxidation of synthetic medium sludge in reactor

- Specific syntrophic ethanol oxidation activity =  $1 \cdot r_{\text{CH}_4} / \text{VSS} = 1 \cdot 35.7 \text{ mmol/L/d} / 0.61 \text{ g/L} = 59 \text{ mmolC/gVSS/d}$

### Specific VFA upgrading activity of synthetic medium sludge in reactor

- Specific (total) VFA upgrading activity = specific odd-numbered VFA upgrading activity + specific even-numbered VFA upgrading activity =  $1362 + 0 = 1362 \text{ mmol C/gVSS/d}$ 
  - Specific odd-numbered VFA upgrading activity =  $(5 \cdot r_{\text{n-Valerate}} + 7 \cdot r_{\text{n-Heptanoate}}) / \text{VSS} = (5 \cdot 131.0 \text{ mmol/L/d} + 7 \cdot 24.9 \text{ mmol/L/d}) / 0.61 \text{ g/L} = 1362 \text{ mmol C/gVSS/d}$
  - Specific even-numbered VFA upgrading activity =  $0 \text{ mmol C/gVSS/d}$  (no even-numbered VFAs were net consumed)

## Specifications ‘non-adapted sludge’

Non-adapted sludge was directly derived from a running continuous chain elongation process that converted acidified food waste and ethanol into MCFAs <sup>2</sup>. The reactor configuration has been described previously <sup>1</sup>. Specifications on process conditions are reported in Table S3. Concentrations and rates of substrates and products are reported in Table S4.

**Table S3.** Specifications of process conditions that conditioned non-adapted sludge

| Specification                | Unit  | Value                                    |
|------------------------------|-------|------------------------------------------|
| Temperature                  | °C    | 30                                       |
| pH                           | -     | 6.8                                      |
| HRT                          | d     | 1.0                                      |
| Substrates in influent       | g/L   | [Acidified Food Waste]<br>32.2 [Ethanol] |
| CO <sub>2</sub> loading rate | L/L/d | 1.0                                      |
| Days after startup           | d     | 103                                      |
| VSS                          | g/L   | 0.35                                     |

**Table S4.** Concentrations and rates of substrates and products in the process from which non-adapted sludge was derived

| Compound        | Concentration<br>[mmol·L <sup>-1</sup> ] | Rate<br>[mmol·L <sup>-1</sup> ·d <sup>-1</sup> ] |
|-----------------|------------------------------------------|--------------------------------------------------|
| Ethanol         | 437.3 ± 34.0                             | -267.6 ± 23.5                                    |
| Propanol        | 0.7 ± 0.9                                | 0.7 ± 0.9                                        |
| Acetate         | 122.1 ± 8.6                              | -13.1 ± 8.3                                      |
| Propionate      | 15.5 ± 1.0                               | -9.2 ± 1.5                                       |
| Isobutyrate     | 6.2 ± 0.4                                | -0.9 ± 0.4                                       |
| n-Butyrate      | 122.8 ± 11.3                             | 18.3 ± 12.4                                      |
| Isovalerate     | 4.0 ± 0.3                                | -0.5 ± 0.3                                       |
| n-Valerate      | 9.4 ± 1.1                                | 4.3 ± 0.9                                        |
| Isocaproate     | 0.4 ± 0.1                                | 0.4 ± 0.1                                        |
| n-Caproate      | 60.7 ± 7.8                               | 48.1 ± 7.5                                       |
| n-Heptanoate    | 0.6 ± 0.1                                | 0.6 ± 0.1                                        |
| n-Caprylate     | 0.5 ± 0.1                                | 0.5 ± 0.1                                        |
| CO <sub>2</sub> | 5.4 ± 3.0 % <sup>i</sup>                 | -37.2 ± 0.1                                      |
| CH <sub>4</sub> | 77.0 ± 42.0 % <sup>i</sup>               | 43.8 ± 2.5                                       |
| H <sub>2</sub>  | 0.0 ± 0.1 % <sup>i</sup>                 | 0.1 ± 0.0                                        |

<sup>i</sup> Concentrations of gaseous compounds (CO<sub>2</sub>, CH<sub>4</sub>, H<sub>2</sub>) are shown as percentage in the headspace at 1 atm

## Specifications ‘non-adapted sludge’

### Specific VFA upgrading activity of non-adapted sludge in reactor

- Specific VFA upgrading activity = specific odd-numbered VFA upgrading activity + specific even-numbered VFA upgrading activity =  $71.6 + 148.8 = 220 \text{ mmol C/gVSS/d}$ 
  - Specific odd-numbered VFA upgrading activity =  $(5 \cdot r_{n\text{-Valerate}} + 7 \cdot r_{n\text{-Heptanoate}}) / \text{VSS} = (5 \cdot 4.3 \text{ mmol/L/d} + 7 \cdot 0.6 \text{ mmol/L/d}) / 0.35 \text{ g/L} = 71.6 \text{ mmol C/gVSS/d}$
  - Specific even-numbered VFA upgrading activity =  $(4 \cdot |r_{\text{acetate}}|) / \text{VSS} = (4 \cdot |-13.1|) / 0.35 = 148.8 \text{ mmol C/gVSS/d}$  (acetate upgrading to n-butyrate)

## Specifications ‘adapted sludge’

Adapted sludge was directly derived from a running continuous chain elongation process that converted acidified food waste and ethanol into MCFAs <sup>2</sup>. The reactor configuration has been described previously <sup>1</sup>. Specifications on process conditions are reported in Table S5. Concentrations and rates of substrates and products are reported in Table S6.

**Table S5.** Specifications of process conditions that conditioned adapted sludge

| Specification                | Unit  | Value                                    |
|------------------------------|-------|------------------------------------------|
| Temperature                  | °C    | 30                                       |
| pH                           | -     | 6.8                                      |
| HRT                          | d     | 4.0                                      |
| Substrates in influent       | g/L   | [Acidified Food Waste]<br>32.2 [Ethanol] |
| CO <sub>2</sub> loading rate | L/L/d | 1.0                                      |
| Days after startup           | d     | 124                                      |
| VSS                          | g/L   | 0.51                                     |

**Table S6.** Concentrations and rates of substrates and products in the process from which adapted sludge was derived

| Compound        | Concentration<br>[mmol·L <sup>-1</sup> ] | Rate<br>[mmol·L <sup>-1</sup> ·d <sup>-1</sup> ] |
|-----------------|------------------------------------------|--------------------------------------------------|
| Ethanol         | 64.4 ± 35.5                              | -125.6 ± 26.0                                    |
| Propanol        | 5.7 ± 3.7                                | 1.4 ± 1.0                                        |
| Acetate         | 31.2 ± 15.2                              | -26.4 ± 4.7                                      |
| Propionate      | 6.4 ± 1.1                                | -4.6 ± 0.3                                       |
| Isobutyrate     | 5.8 ± 0.3                                | -0.3 ± 0.1                                       |
| n-Butyrate      | 90.6 ± 18.4                              | -3.9 ± 4.5                                       |
| Isovalerate     | 4.1 ± 0.3                                | -0.1 ± 0.1                                       |
| n-Valerate      | 13.6 ± 1.7                               | 2.2 ± 0.4                                        |
| Isocaproate     | 0.8 ± 0.1                                | 0.1 ± 0.0                                        |
| n-Caproate      | 199.9 ± 16.0                             | 46.3 ± 2.8                                       |
| n-Heptanoate    | 2.5 ± 0.7                                | 0.5 ± 0.1                                        |
| n-Caprylate     | 3.5 ± 1.1                                | 0.8 ± 0.2                                        |
| CO <sub>2</sub> | 54.6 ± 25.1 % <sup>i</sup>               | -22.5 ± 2.9                                      |
| CH <sub>4</sub> | 19.9 ± 21.5 % <sup>i</sup>               | 6.4 ± 5.8                                        |
| H <sub>2</sub>  | 11.1 ± 14.0 % <sup>i</sup>               | 3.7 ± 3.8                                        |

<sup>i</sup> Concentrations of gaseous compounds (CO<sub>2</sub>, CH<sub>4</sub>, H<sub>2</sub>) are shown as percentage in the headspace at 1 atm



## Specifications 'adapted sludge'

### Specific VFA upgrading activity of adapted sludge in reactor

- Specific VFA upgrading activity = specific odd-numbered VFA upgrading activity + specific even-numbered VFA upgrading activity =  $29.0 + 357.5 = 386 \text{ mmol C/gVSS/d}$ 
  - Specific odd-numbered VFA upgrading activity =  $(5 \cdot r_{n\text{-Valerate}} + 7 \cdot r_{n\text{-Heptanoate}}) / \text{VSS} = (5 \cdot 2.2 \text{ mmol/L/d} + 7 \cdot 0.5 \text{ mmol/L/d}) / 0.51 \text{ g/L} = 29.0 \text{ mmol C/gVSS/d}$
  - Specific even-numbered VFA upgrading activity =  $(6 \cdot |r_{\text{acetate}}| + 6 \cdot |r_{n\text{-Butyrate}}|) / \text{VSS} = (6 \cdot |-26.4 \text{ mmol/L/d}| + 6 \cdot |-3.9 \text{ mmol/L/d}|) / 0.51 \text{ g/L} = 357.5 \text{ mmol C/gVSS/d}$  (acetate upgrading to n-caproate plus n-butyrate upgrading to n-caproate)

## References

1. Roghair, M.; Strik, D. P. B. T. B.; Steinbusch, K. J. J.; Weusthuis, R. A.; Bruins, M. E.; Buisman, C. J. N., Granular sludge formation and characterization in a chain elongation process. *Process Biochem.* **2016**, *51* (10), 1594-1598.
2. Roghair, M.; Liu, Y.; Strik, D. P. B. T. B.; Weusthuis, R. A.; Bruins, M. E.; Buisman, C. J. N., Development of an Effective Chain Elongation Process From Acidified Food Waste and Ethanol Into n-Caproate. *Frontiers in Bioengineering and Biotechnology* **2018**, *6* (50).
